# Supplementary material for: Genome-wide association analysis suggests novel loci underlying thyroid antibodies in Hashimoto’s thyroiditis
Source: PubMed Central journal article supplement (PMC6440971; doi:10.1038/s41598-019-41850-6), 2019-03-29
Supplement: 41598_2019_41850_MOESM1_ESM.pdf [file 41598_2019_41850_MOESM1_ESM.pdf]

# Supplementary Material

Supplement to: “Genome-wide association analysis suggests novel loci underlying thyroid antibodies in Hashimoto’s thyroiditis” (Scientific Reports).

Authors: Luka Brčić<sup>1</sup>, Ana Barić<sup>2</sup>, Sanda Gračan<sup>2</sup>, Vesela Torlak<sup>2</sup>, Marko Brekalo<sup>2</sup>, Veselin Škrabić<sup>3</sup>, Tatijana Zemunik<sup>1</sup>, Maja Barbalić<sup>1</sup>, Ante Punda<sup>2</sup>, Vesna Boraska Perica<sup>1</sup>

<sup>1</sup>Department of Medical Biology, University of Split, School of Medicine, Split, Croatia

<sup>2</sup>Department of Nuclear Medicine, University Hospital Split, Split, Croatia

<sup>3</sup>Department of Pediatrics, University Hospital Split, Split, Croatia

## Contents

|                                                                        |    |
|------------------------------------------------------------------------|----|
| Supplementary Text .....                                               | 2  |
| Four candidate genomic regions associated with TgAb/TPOAb levels ..... | 2  |
| References .....                                                       | 3  |
| Supplementary Tables .....                                             | 5  |
| Supplementary Table 1 .....                                            | 5  |
| Supplementary Table 2 .....                                            | 6  |
| Supplementary Table 3 .....                                            | 7  |
| Supplementary Table 4 .....                                            | 8  |
| Supplementary Figures .....                                            | 9  |
| Supplementary Figure 1 .....                                           | 9  |
| Supplementary Figure 2 .....                                           | 10 |
| Supplementary Figure 3 .....                                           | 11 |
| Supplementary Figure 4 .....                                           | 12 |
| Supplementary Figure 5 .....                                           | 14 |
| Supplementary Figure 6 .....                                           | 15 |

## Supplementary Text

### Four candidate genomic regions associated with TgAb/TPOAb levels

Of previously associated TgAb genomic regions we found association signal near *NPSR1* (Neuropeptide S Receptor 1) that encodes G protein-coupled receptor involved in immune response<sup>1</sup>. Our most associated SNP resides between *NPSR1* and *DPY19L1* (Dpy-19 Like C-Mannosyltransferase 1) (Supplementary Figure 4a), of which *NPSR1* was previously suggestively associated with IgG glycosylation<sup>2</sup>, asthma<sup>3</sup> and rheumatoid arthritis<sup>1</sup>. Our data support the role of *NPSR1* as a promising candidate in TgAb regulation.

We have also replicated association of the region around *INSIG1* (Insulin Induced Gene 1), which regulates metabolism of cholesterol, glucose and lipogenesis ([www.genecards.org](http://www.genecards.org)), with TgAb levels. However, our most associated SNP from this region resides near *CNPY1* (Canopy FGF Signaling Regulator 1) (Supplementary Figure 4b). Neither of these genes has previous established associations with relevant phenotypes.

Of previously associated TPOAb genomic regions we found signal around *SPPL3* (Signal Peptide Peptidase Like 3) that was originally discovered in T1D patients<sup>4</sup>. The most associated SNP from this region in our study is rs7966322 near *HNF1A* (HNF1 Homeobox A) (Supplementary Figure 5a). Interestingly, in addition to suggestive association of *SPPL3* with TPOAb levels, *SPPL3* was already associated with allergic disease (asthma, hay fever or eczema)<sup>5</sup>, age at menopause<sup>6</sup> and SLE<sup>7</sup>, all the traits that were already brought in connection with thyroid antibodies and discussed in our paper. Additionally, *HNF1A* acts as a transcription factor for several liver-specific genes ([www.genecards.org](http://www.genecards.org)) and has a substantial record of associations in GWAS catalogue. Among few most relevant to our phenotype are associations with inflammation marker alpha-1 antitrypsin levels<sup>8</sup>, C-reactive protein<sup>9</sup>, which was also found to be correlated with both thyroid antibodies<sup>10</sup>, N-glycan levels<sup>11</sup> and epithelial ovarian cancer<sup>12</sup>. Taken together, our data suggest that genomic region encompassing *HNF1A* and *SPPL3* is potentially involved in TPOAb regulation in HT patients.

Finally, we also found evidence of association of the region around *FCRL3* (Fc Receptor Like 3) originally reported in T1D patients<sup>4</sup>. In our study, the most associated SNP (rs4110937) resides near *FCRL5* (Fc Receptor Like 5) (Supplementary Figure 5b). This region contains a cluster of *FCRL* genes belonging to the same immunoglobulin receptor superfamily with suggested role in immune system ([www.genecards.org](http://www.genecards.org)). The role of this gene in autoimmunity is further reinforced by established association with Graves' disease (GD)<sup>13-15</sup>, another form of AITD characterized by the presence of elevated thyroid antibodies<sup>16</sup>, and with Graves ophthalmopathy<sup>17</sup> that has been correlated with the presence of TPOAbs in children with GD<sup>18</sup>. In the case of GD where both genes, *FCRL3* and *FCRL5*, were found to be

associated with disease, additional analysis suggested that *FCRL5* was secondary to the effect of *FCRL3*<sup>19</sup>. Additionally, *FCRL3* has been associated with several other autoimmune diseases<sup>20</sup> and traits such as insulinoma-associated antigen 2 autoantibody levels in T1D<sup>4</sup>, the presence of antibodies in SLE patients<sup>21</sup>, rheumatoid arthritis<sup>22</sup> and selective IgA deficiency<sup>23</sup>. *FCRL3* was also found to be overexpressed in children with autoimmune thyroiditis when compared to adults<sup>24</sup>. Our data, together with previous reports, suggest that genomic region encompassing *FCRL* genes is a good candidate locus for regulation of TPOAb levels in patients with HT. Fine-mapping of this region in HT patients is crucial to resolve the causal variants and associated gene.

## References

- 1 Robledo, G. *et al.* NPSR1 gene is associated with reduced risk of rheumatoid arthritis. *The Journal of rheumatology* **39**, 1166-1170, doi:10.3899/jrheum.111205 (2012).
- 2 Lauc, G. *et al.* Loci associated with N-glycosylation of human immunoglobulin G show pleiotropy with autoimmune diseases and haematological cancers. *PLoS genetics* **9**, e1003225, doi:10.1371/journal.pgen.1003225 (2013).
- 3 Demenais, F. *et al.* Multiancestry association study identifies new asthma risk loci that colocalize with immune-cell enhancer marks. *Nature genetics* **50**, 42-53, doi:10.1038/s41588-017-0014-7 (2018).
- 4 Plagnol, V. *et al.* Genome-wide association analysis of autoantibody positivity in type 1 diabetes cases. *PLoS genetics* **7**, e1002216, doi:10.1371/journal.pgen.1002216 (2011).
- 5 Ferreira, M. A. *et al.* Shared genetic origin of asthma, hay fever and eczema elucidates allergic disease biology. *Nature genetics* **49**, 1752-1757, doi:10.1038/ng.3985 (2017).
- 6 Day, F. R. *et al.* Large-scale genomic analyses link reproductive aging to hypothalamic signaling, breast cancer susceptibility and BRCA1-mediated DNA repair. *Nature genetics* **47**, 1294-1303, doi:10.1038/ng.3412 (2015).
- 7 Gateva, V. *et al.* A large-scale replication study identifies TNIP1, PRDM1, JAZF1, UHRF1BP1 and IL10 as risk loci for systemic lupus erythematosus. *Nature genetics* **41**, 1228-1233, doi:10.1038/ng.468 (2009).
- 8 Setoh, K. *et al.* Three missense variants of metabolic syndrome-related genes are associated with alpha-1 antitrypsin levels. *Nature communications* **6**, 7754, doi:10.1038/ncomms8754 (2015).
- 9 Dehghan, A. *et al.* Meta-analysis of genome-wide association studies in >80 000 subjects identifies multiple loci for C-reactive protein levels. *Circulation* **123**, 731-738, doi:10.1161/CIRCULATIONAHA.110.948570 (2011).
- 10 Czarnywojtek, A. *et al.* The role of serum C-reactive protein measured by high-sensitive method in thyroid disease. *Archivum immunologiae et therapiae experimentalis* **62**, 501-509, doi:10.1007/s00005-014-0282-1 (2014).

- 11 Huffman, J. E. *et al.* Polymorphisms in B3GAT1, SLC9A9 and MGAT5 are associated with variation within the human plasma N-glycome of 3533 European adults. *Human molecular genetics* **20**, 5000-5011, doi:10.1093/hmg/ddr414 (2011).
- 12 Phelan, C. M. *et al.* Identification of 12 new susceptibility loci for different histotypes of epithelial ovarian cancer. *Nature genetics* **49**, 680-691, doi:10.1038/ng.3826 (2017).
- 13 Khong, J. J. *et al.* Pooled genome wide association detects association upstream of FCRL3 with Graves' disease. *BMC genomics* **17**, 939, doi:10.1186/s12864-016-3276-z (2016).
- 14 Chu, X. *et al.* A genome-wide association study identifies two new risk loci for Graves' disease. *Nature genetics* **43**, 897-901, doi:10.1038/ng.898 (2011).
- 15 Zhao, S. X. *et al.* A refined study of FCRL genes from a genome-wide association study for Graves' disease. *PLoS one* **8**, e57758, doi:10.1371/journal.pone.0057758 (2013).
- 16 Zaletel, K. Determinants of thyroid autoantibody production in Hashimoto's thyroiditis. *Expert review of clinical immunology* **3**, 217-223, doi:10.1586/1744666X.3.2.217 (2007).
- 17 Wu, S., Cai, T., Chen, F., He, X. & Cui, Z. Genetic associations of FCRL3 polymorphisms with the susceptibility of Graves ophthalmopathy in a Chinese population. *Int J Clin Exp Med* **8**, 16948-16954 (2015).
- 18 Lee, J. H., Park, S. H., Koh, D. G. & Suh, B. K. Thyroid peroxidase antibody positivity and triiodothyronine levels are associated with pediatric Graves' ophthalmopathy. *World journal of pediatrics : WJP* **10**, 155-159, doi:10.1007/s12519-014-0476-y (2014).
- 19 Simmonds, M. J. *et al.* Association of Fc receptor-like 5 (FCRL5) with Graves' disease is secondary to the effect of FCRL3. *Clinical endocrinology* **73**, 654-660, doi:10.1111/j.1365-2265.2010.03843.x (2010).
- 20 Yang, Y., Su, X., Zhang, K. & Zhou, R. The Fc receptor-like 3 gene polymorphisms and susceptibility to autoimmune diseases: an updated meta-analysis. *Autoimmunity* **46**, 547-558, doi:10.3109/08916934.2013.835804 (2013).
- 21 Piotrowski, P. *et al.* The FCRL3 -169T>C polymorphism might be associated with some autoantibody presence in patients with SLE in a Polish population. *Modern rheumatology*, doi:10.1007/s10165-013-0875-2 (2013).
- 22 Okada, Y. *et al.* Genetics of rheumatoid arthritis contributes to biology and drug discovery. *Nature* **506**, 376-381, doi:10.1038/nature12873 (2014).
- 23 Bronson, P. G. *et al.* Common variants at PVT1, ATG13-AMBRA1, AHI1 and CLEC16A are associated with selective IgA deficiency. *Nature genetics* **48**, 1425-1429, doi:10.1038/ng.3675 (2016).
- 24 Wojciechowska-Durczynska, K., Krawczyk-Rusiecka, K., Zygmunt, A., Stawerska, R. & Lewinski, A. In children with autoimmune thyroiditis CTLA4 and FCRL3 genes--but not PTPN22--are overexpressed when compared to adults. *Neuro endocrinology letters* **37**, 65-69 (2016).

## Supplementary Tables

**Supplementary Table 1.** Results for TgAb, TPOAb and bivariate GWAS analysis in HT patients for genetic variants with  $P < 10^{-5}$ .

| <b>TgAb levels</b>                                |           |                  |                                          |    |    |       |          |       |          |  |
|---------------------------------------------------|-----------|------------------|------------------------------------------|----|----|-------|----------|-------|----------|--|
| Chr                                               | Position  | SNP              | Gene/ nearest genes                      | EA | OA | EAF   | $\beta$  | SE    | P        |  |
| 7                                                 | 118325734 | rs6972286        | ANKRD7 (415 kb away), LSM8 (465 kb away) | A  | T  | 0,469 | 0,358    | 0,068 | 2,34E-07 |  |
| 17                                                | 49749312  | rs756763         | CA10                                     | A  | G  | 0,467 | 0,406    | 0,080 | 6,05E-07 |  |
| 17                                                | 13359435  | rs977706         | near HS3ST3A1                            | A  | T  | 0,86  | -0,513   | 0,105 | 1,42E-06 |  |
| 12                                                | 129621691 | 12:129621691:T:C | TMEM132D                                 | T  | C  | 0,472 | -0,395   | 0,081 | 1,49E-06 |  |
| 12                                                | 152581    | rs183751285      | near IQSEC3                              | A  | G  | 0,723 | 0,537    | 0,115 | 4,05E-06 |  |
| 1                                                 | 213134407 | rs71634696       | VASH2                                    | G  | T  | 0,905 | 0,633    | 0,137 | 5,02E-06 |  |
| 5                                                 | 494964    | rs60857630       | SLC9A3                                   | C  | G  | 0,803 | 0,420    | 0,092 | 5,99E-06 |  |
| 20                                                | 37250754  | rs6026868        | ARHGAP40                                 | T  | A  | 0,833 | -0,464   | 0,103 | 8,56E-06 |  |
| 2                                                 | 56335537  | rs7588040        | near CCDC85A                             | T  | C  | 0,239 | 0,369    | 0,082 | 9,11E-06 |  |
| 14                                                | 40893414  | rs9707549        | /                                        | C  | T  | 0,54  | -0,310   | 0,069 | 9,72E-06 |  |
| 8                                                 | 11711473  | rs1293297        | CTSB                                     | G  | C  | 0,901 | 0,526    | 0,118 | 9,99E-06 |  |
| <b>TPOAb levels</b>                               |           |                  |                                          |    |    |       |          |       |          |  |
| Chr                                               | Position  | SNP              | Gene/ nearest genes                      | EA | OA | EAF   | $\beta$  | SE    | P        |  |
| 4                                                 | 165934574 | rs12507813       | TRIM61 (36 kb away), TRIM60 (18 kb away) | G  | C  | 0,857 | -0,485   | 0,095 | 4,95E-07 |  |
| 10                                                | 51593354  | rs7085433        | NCOA4, TIMM23B, TIMM23                   | G  | A  | 0,894 | -0,539   | 0,109 | 1,20E-06 |  |
| 9                                                 | 77313196  | rs12551356       | near TRPM6, RORB                         | G  | T  | 0,904 | -0,726   | 0,148 | 1,37E-06 |  |
| 1                                                 | 197837567 | rs72744965       | near C1orf53                             | T  | C  | 0,696 | -0,380   | 0,080 | 2,78E-06 |  |
| 12                                                | 76219594  | rs17115753       | near PHLDA1                              | A  | G  | 0,949 | -0,796   | 0,170 | 4,02E-06 |  |
| 9                                                 | 98907331  | rs4077231        | near LOC158434                           | A  | T  | 0,609 | -0,310   | 0,068 | 5,98E-06 |  |
| 3                                                 | 163258976 | rs6804755        | near LINC01192                           | T  | G  | 0,534 | 0,322    | 0,070 | 6,22E-06 |  |
| 3                                                 | 84646348  | rs113091167      | near LINC00971                           | A  | C  | 0,869 | 0,527    | 0,116 | 6,95E-06 |  |
| 9                                                 | 117421666 | rs79660918       | near C9orf91,                            | C  | T  | 0,919 | -0,576   | 0,127 | 8,04E-06 |  |
| 7                                                 | 46631580  | rs62452723       | intergenic                               | G  | A  | 0,949 | -0,721   | 0,159 | 8,18E-06 |  |
| 5                                                 | 175084333 | rs9313723        | HRH2                                     | A  | C  | 0,9   | -0,575   | 0,128 | 9,44E-06 |  |
| <b>TgAb and TPOAb levels (bivariate analysis)</b> |           |                  |                                          |    |    |       |          |       |          |  |
| Chr                                               | Position  | SNP              | Gene/ nearest genes                      | EA | OA | EAF   | P        |       |          |  |
| 4                                                 | 165947490 | rs2056252        | near TRIM61, TRIM60                      | G  | A  | 0,861 | 7,06E-07 |       |          |  |
| 7                                                 | 118325734 | rs6972286        | ANKRD7 (415 kb away), LSM8 (465 kb away) | A  | T  | 0,469 | 1,61E-06 |       |          |  |
| 5                                                 | 103425505 | rs13190616       | RP11-138I23.1, NUDT12 (527 kb away)      | C  | T  | 0,344 | 2,01E-06 |       |          |  |
| 17                                                | 13359435  | rs977706         | near HS3ST3A1                            | A  | T  | 0,86  | 3,97E-06 |       |          |  |
| 17                                                | 49749312  | rs756763         | CA10                                     | A  | G  | 0,467 | 4,10E-06 |       |          |  |
| 9                                                 | 77313196  | rs12551356       | near TRPM6, RORB                         | G  | T  | 0,904 | 4,96E-06 |       |          |  |
| 12                                                | 129621691 | 12:129621691:T:C | TMEM132D                                 | T  | C  | 0,472 | 6,47E-06 |       |          |  |
| 3                                                 | 106377818 | rs561030786      | DUBR (582 kb away)                       | C  | G  | 0,92  | 7,33E-06 |       |          |  |
| 10                                                | 51593354  | rs7085433        | NCOA4, TIMM23B, TIMM23                   | G  | A  | 0,894 | 7,46E-06 |       |          |  |
| 2                                                 | 49250971  | rs12713034       | FSHR                                     | A  | G  | 0,557 | 7,66E-06 |       |          |  |

Chr-chromosome, EA-effect allele, OA-other allele, EAF-effect allele frequency,  $\beta$ -SNP effect size.

SE-standard error, P-p-value. Positions are based on the GRCh 37 build. All  $\beta$  (SE) values are calculated for effect allele.

Top associated SNPs from TgAb and TPOAb GWAS analysis, as well as SNPs from bivariate analysis that were not identified in a single GWAS analyses are highlighted.

**Supplementary Table 2.** Comparison of loci known to be associated with thyroid autoantibodies in general population with results from the present study.

| Chr | Position  | SNP         | PMID of original study | Trait | Population | Original P | Nearest gene/region | EA | OA | EAF   | $\beta$ | SE    | P      | Direction of effect |
|-----|-----------|-------------|------------------------|-------|------------|------------|---------------------|----|----|-------|---------|-------|--------|---------------------|
|     |           |             |                        |       |            |            |                     |    |    |       |         |       |        |                     |
| 6   | 170582064 | rs4710782   | 29678681               | TgAb  | Croatian   | 6,16E-08   | <i>DLL1</i>         | C  | G  | 0,278 | -0,016  | 0,088 | 0,8554 | opposite            |
| 1   | 65544151  | rs10889518  | 29678681               | TgAb  | Croatian   | 1,27E-07   | <i>JAK1</i>         | A  | T  | 0,057 | 0,068   | 0,160 | 0,6708 | same                |
| 7   | 155106435 | rs183893980 | 29678681               | TgAb  | Croatian   | 8,87E-07   | <i>INSIG1</i>       | A  | G  | 0,122 | 0,068   | 0,118 | 0,5616 | same                |
| 10  | 134943325 | rs73399159  | 29678681               | TgAb  | Croatian   | 2,37E-07   | <i>ADGRA1</i>       | G  | A  | 0,868 | -0,146  | 0,110 | 0,1836 | same                |
| 7   | 34736202  | rs323907    | 29678681               | TgAb  | Croatian   | 3,45E-07   | <i>NPSR1</i>        | C  | T  | 0,885 | 0,032   | 0,114 | 0,7812 | same                |
| 6   | 158611258 | rs9365994   | 29678681               | TgAb  | Croatian   | 6,91E-07   | <i>GTF2H5</i>       | C  | A  | 0,829 | 0,033   | 0,092 | 0,7230 | same                |
| 5   | 162212404 | rs1288213   | 29678681               | TgAb  | Croatian   | 7,21E-07   | <i>CCNG1</i>        | A  | G  | 0,244 | 0,131   | 0,081 | 0,1040 | opposite            |
| 1   | 114173410 | rs1230666   | 24586183               | TPOAb | European   | 1,80E-08   | <i>MAGI3</i>        | A  | G  | 0,132 | 0,056   | 0,108 | 0,6058 | same                |
| 2   | 1407815   | rs11675434  | 24586183               | TPOAb | European   | 1,50E-16   | <i>TPO</i>          | C  | T  | 0,542 | -0,095  | 0,070 | 0,1778 | same                |
| 6   | 31429927  | rs3094228   | 24586183               | TPOAb | European   | 3,80E-07   | <i>HLA region</i>   | T  | C  | 0,762 | -0,109  | 0,082 | 0,1850 | same                |
| 6   | 32787036  | rs1894407   | 24586183               | TPOAb | European   | 1,20E-07   | <i>TAP2</i>         | C  | A  | 0,662 | 0,089   | 0,073 | 0,2273 | same                |
| 6   | 33055605  | rs9277555   | 24586183               | TPOAb | European   | 5,80E-07   | <i>HLA-DPB1</i>     | G  | A  | 0,78  | 0,017   | 0,084 | 0,8400 | same                |
| 6   | 90880393  | rs10944479  | 24586183               | TPOAb | European   | 4,00E-08   | <i>BACH2</i>        | G  | A  | 0,802 | -0,090  | 0,104 | 0,3851 | same                |
| 12  | 112007756 | rs653178    | 24586183               | TPOAb | European   | 9,90E-10   | <i>ATXN2</i>        | C  | T  | 0,582 | 0,116   | 0,068 | 0,0913 | same                |
| 16  | 79700447  | rs4889009   | 24586183               | TPOAb | European   | 3,30E-07   | intergenic          | G  | C  | 0,414 | 0,098   | 0,073 | 0,1785 | same                |
| 19  | 4768917   | rs879564    | 24586183               | TPOAb | European   | 1,10E-07   | <i>MIR7-3HG</i>     | A  | G  | 0,645 | 0,159   | 0,073 | 0,0289 | same                |
| 20  | 51009757  | rs4811340   | 24586183               | TPOAb | European   | 5,60E-07   | intergenic          | G  | C  | 0,689 | -0,005  | 0,075 | 0,9489 | opposite            |
| 2   | 1417244   | rs2071403   | 24722205               | TPOAb | Korean     | 1,30E-10   | <i>TPO</i>          | A  | G  | 0,488 | -0,097  | 0,073 | 0,1889 | same                |
| 6   | 33082308  | rs733208    | 24722205               | TPOAb | Korean     | 4,20E-07   | <i>HLA-DPB2</i>     | G  | A  | 0,829 | -0,028  | 0,095 | 0,7704 | same                |
| 9   | 104742291 | rs1935377   | 29678681               | TPOAb | Croatian   | 8,58E-08   | <i>GRIN3A</i>       | T  | C  | 0,381 | -0,011  | 0,078 | 0,8858 | same                |
| 1   | 34438957  | rs10753297  | 29678681               | TPOAb | Croatian   | 5,59E-07   | <i>CSMD2</i>        | A  | T  | 0,643 | 0,004   | 0,070 | 0,9561 | same                |
| 17  | 31277765  | rs2428361   | 29678681               | TPOAb | Croatian   | 9,16E-07   | <i>SPACA3</i>       | C  | T  | 0,739 | 0,145   | 0,080 | 0,0696 | same                |
| 10  | 6169140   | rs11256909  | 29678681               | TPOAb | Croatian   | 9,61E-07   | <i>PFKFB3</i>       | A  | C  | 0,698 | 0,076   | 0,074 | 0,3080 | same                |

Chr-chromosome, PMID-Pubmed identification number, Original P-p-value from original study, EA-effect allele, OA-other allele. EAF-effect allele frequency,  $\beta$ -SNP effect size, SE-standard error, P-p-value.

Positions are based on the GRCh 37 build. All  $\beta$  (SE) values are calculated for effect allele.

Regions containing SNPs associated with TgAb levels at  $P < 10^{-3}$  in present study are highlighted.

**Supplementary Table 3.** Comparison of loci known to be associated with TPOAb in T1D patients with results from the present study.

| Chr | Position  | SNP        | PMID of original study | Trait | Population | Original P | Nearest gene/region | EA |    | EAF   | $\beta$ | SE    | P      | Direction of effect |
|-----|-----------|------------|------------------------|-------|------------|------------|---------------------|----|----|-------|---------|-------|--------|---------------------|
|     |           |            |                        |       |            |            |                     | EA | OA |       |         |       |        |                     |
| 1   | 114377568 | rs2476601  | 21829393               | TPOAb | British    | 2,10E-05   | <i>PTPN22</i>       | A  | G  | 0,114 | 0,124   | 0,112 | 0,2689 | same                |
| 1   | 157661848 | rs11264798 | 21829393               | TPOAb | British    | 0,00035    | <i>FCRL3</i>        | C  | G  | 0,525 | -0,125  | 0,068 | 0,0680 | same                |
| 1   | 157771880 | rs4971154  | 21829393               | TPOAb | British    | 0,0033     | <i>FCRL1</i>        | C  | T  | 0,48  | 0,157   | 0,069 | 0,0236 | same                |
| 2   | 191964633 | rs7574865  | 21829393               | TPOAb | British    | 0,01       | <i>STAT4</i>        | T  | G  | 0,29  | 0,047   | 0,076 | 0,5380 | same                |
| 2   | 204738919 | rs3087243  | 21829393               | TPOAb | British    | 0,0011     | <i>CTLA4</i>        | G  | A  | 0,575 | 0,046   | 0,071 | 0,5145 | same                |
| 4   | 123377980 | rs2069762  | 21829393               | TPOAb | British    | 0,0045     | <i>IL2-IL21</i>     | A  | C  | 0,685 | 0,111   | 0,075 | 0,1410 | opposite            |
| 6   | 90958231  | rs11755527 | 21829393               | TPOAb | British    | 9,70E-07   | <i>BACH2</i>        | C  | G  | 0,529 | -0,048  | 0,068 | 0,4796 | same                |
| 12  | 111884608 | rs3184504  | 21829393               | TPOAb | British    | 0,003      | <i>SH2B3</i>        | T  | C  | 0,574 | 0,118   | 0,068 | 0,0809 | same                |
| 12  | 121229893 | rs662739   | 21829393               | TPOAb | British    | 0,011      | <i>SPPL3</i>        | T  | C  | 0,341 | 0,010   | 0,074 | 0,8886 | same                |
| 15  | 38907041  | rs7171171  | 21829393               | TPOAb | British    | 0,0004     | <i>RASGRP1</i>      | A  | G  | 0,781 | -0,001  | 0,087 | 0,9912 | opposite            |
| 21  | 43841328  | rs3788013  | 21829393               | TPOAb | British    | 0,00099    | <i>UBASH3A</i>      | C  | A  | 0,589 | -0,089  | 0,074 | 0,2341 | same                |

Chr-chromosome, PMID-Pubmed identification number, Original P-p-value from original study, EA-effect allele, OA-other allele. EAF-effect allele frequency,  $\beta$ -SNP effect size, SE-standard error, P-p-value.

Positions are based on the GRCh 37 build. All  $\beta$  (SE) values are calculated for effect allele.

Regions containing SNPs associated with TPOAb levels at  $P < 10^{-3}$  in present study are highlighted.

**Supplementary Table 4.** Associations of genetic variants with other phenotypes, in the 500 kb window around lead SNP, listed in the NHGRI-EBI GWAS catalog and/or PhenoScanner.**Genomic region around TgAb associated SNP rs6972286 (chr7: 118185680-119185680)**

No genome-wide associations in this region.

**Genomic region around TgAb associated SNP rs756763 (Chr17:51171952-52171952)**

| Associated SNP                   | LD ( $R^2$ ) with lead SNP | Position   | P                     | Functional effect  | Gene/nearest gene                      | Associated trait                                                                | Source         | PubMed ID |
|----------------------------------|----------------------------|------------|-----------------------|--------------------|----------------------------------------|---------------------------------------------------------------------------------|----------------|-----------|
| <b>Genome-wide associations:</b> |                            |            |                       |                    |                                        |                                                                                 |                |           |
|                                  |                            |            | $2 \times 10^{-24}$ ; |                    |                                        |                                                                                 |                | 25231870; |
|                                  |                            |            | $7 \times 10^{-13}$ ; |                    |                                        |                                                                                 |                | 21102462; |
| rs9635759                        | 0.0339                     | 51.536.424 | $1 \times 10^{-10}$   | intergenic_variant | between <i>RPL7P48</i> and <i>CA10</i> | Menarche (age at onset)                                                         | NHGRI-EBI GWAS | 27182965  |
| rs1392935                        | 0.0004                     | 51.861.769 | $1 \times 10^{-8}$    | intron_variant     | <i>CA10</i>                            | Bacterial meningitis                                                            | NHGRI-EBI GWAS | 28928442  |
| <b>Suggestive associations:</b>  |                            |            |                       |                    |                                        |                                                                                 |                |           |
| rs4794295                        | 0.638                      | 49.749.312 | $1 \times 10^{-6}$    | intron_variant     | <i>CA10</i>                            | Differential exon level expression of <i>CA10</i> probe 3762759 in brain cortex | PhenoScanner   | 19222302  |

**Genomic region around TPOAb associated SNP rs12507813 (Chr4:164513422-165513422)**

| Associated SNP                   | LD ( $R^2$ ) with lead SNP | Position    | P                  | Functional effect  | Gene                                       | Associated trait                          | Source         | PubMed ID |
|----------------------------------|----------------------------|-------------|--------------------|--------------------|--------------------------------------------|-------------------------------------------|----------------|-----------|
| <b>Genome-wide associations:</b> |                            |             |                    |                    |                                            |                                           |                |           |
| rs17046216                       | 0.013                      | 165.334.552 | $2 \times 10^{-8}$ | intron_variant     | <i>MSMO1</i>                               | Insulin-related traits                    | NHGRI-EBI GWAS | 22791750  |
| rs4691139                        | 0.1614                     | 164.987.569 | $3 \times 10^{-8}$ | intergenic_variant | between <i>TRIM61</i> and <i>LOC391713</i> | Ovarian cancer in BRCA1 mutation carriers | NHGRI-EBI GWAS | 23544013  |
| rs62353264                       | 0.0018                     | 16.516.465  | $4 \times 10^{-8}$ | intron_variant     | <i>TMEM192</i>                             | Neuroticism                               | NHGRI-EBI GWAS | 27067015  |
| <b>Suggestive associations:</b>  |                            |             |                    |                    |                                            |                                           |                |           |
| rs3733418                        | 0.8842                     | 164.957.183 | $9 \times 10^{-6}$ | intron_variant     | <i>TRIM61</i>                              | Obesity related traits                    | PhenoScanner   | 23251661  |

**Genomic region around bivariate TgAb-TPOAb associated SNP rs13190616 (Chr5:103589804-104589804)**

| Associated SNP                   | LD ( $R^2$ ) with lead SNP | Position    | P                   | Functional effect  | Gene                          | Associated trait                           | Source         | PubMed ID |
|----------------------------------|----------------------------|-------------|---------------------|--------------------|-------------------------------|--------------------------------------------|----------------|-----------|
| <b>Genome-wide associations:</b> |                            |             |                     |                    |                               |                                            |                |           |
| rs13177365                       | 0.0036                     | 104.578.842 | $7 \times 10^{-12}$ | intron_variant     | <i>RP11-6N13.1</i>            | Depressive symptoms (multi-trait analysis) | NHGRI-EBI GWAS | 29292387  |
| rs1363103                        | 0.0132                     | 104.582.136 | $2 \times 10^{-9}$  | intron_variant     | <i>RP11-6N13.1</i>            | Subjective well-being                      | NHGRI-EBI GWAS | 29292387  |
| rs12658032                       | 0.0058                     | 104.568.525 | $6 \times 10^{-9}$  | intron_variant     | <i>RP11-6N13.1</i>            | Depressive symptoms                        | NHGRI-EBI GWAS | 29292387  |
| <b>Suggestive associations:</b>  |                            |             |                     |                    |                               |                                            |                |           |
| rs500141                         | 0.0028                     | 103.687.094 | $9 \times 10^{-7}$  | intergenic_variant | closest gene is <i>NUDT12</i> | Measles                                    | NHGRI-EBI GWAS | 28928442  |

**Genomic region around bivariate TgAb-TPOAb associated SNP rs561030786 (Chr3:106158971-107158971)**

| Associated SNP                              | LD ( $R^2$ ) with lead SNP | Position    | P                  | Functional effect | Gene             | Associated trait                         | Source         | PubMed ID |
|---------------------------------------------|----------------------------|-------------|--------------------|-------------------|------------------|------------------------------------------|----------------|-----------|
| <b>Genome-wide associations:</b>            |                            |             |                    |                   |                  |                                          |                |           |
| No genome-wide associations in this region. |                            |             |                    |                   |                  |                                          |                |           |
| <b>Suggestive associations:</b>             |                            |             |                    |                   |                  |                                          |                |           |
| rs9821348                                   | 0.0011                     | 106.570.103 | $5 \times 10^{-6}$ | intron_variant    | <i>LINC00882</i> | Perceived unattractiveness to mosquitoes | NHGRI-EBI GWAS | 28199695  |

**Genomic region around bivariate TgAb-TPOAb associated SNP rs12713034 (Chr2:48523832-49523832)**

| Associated SNP                   | LD ( $R^2$ ) with lead SNP | Position   | P                   | Functional effect  | Gene                                                | Associated trait                                           | Source         | PubMed ID |
|----------------------------------|----------------------------|------------|---------------------|--------------------|-----------------------------------------------------|------------------------------------------------------------|----------------|-----------|
| <b>Genome-wide associations:</b> |                            |            |                     |                    |                                                     |                                                            |                |           |
| rs13405728                       | 0.0113                     | 48.751.020 | $8 \times 10^{-21}$ | intron_variant     | <i>STON1-GTF2A1L, LHCGR</i>                         | Polycystic ovary syndrome                                  | NHGRI-EBI GWAS | 21151128  |
| rs2268361                        | 0.0606                     | 48.974.473 | $1 \times 10^{-12}$ | intron_variant     | <i>FSHR</i>                                         | Polycystic ovary syndrome                                  | NHGRI-EBI GWAS | 22885925  |
| rs13405728                       | 0.0113                     | 48.751.020 | $4 \times 10^{-9}$  | intron_variant     | <i>STON1-GTF2A1L, LHCGR</i>                         | Polycystic ovary syndrome                                  | NHGRI-EBI GWAS | 22885925  |
| rs4596023                        | 0.0111                     | 48.728.544 | $2 \times 10^{-8}$  | intron_variant     | <i>STON1-GTF2A1L, LHCGR</i>                         | Body mass indeks                                           | NHGRI-EBI GWAS | 28892062  |
| rs4482537                        | 0.0069                     | 48.825.116 | $3 \times 10^{-8}$  | intergenic_variant | between <i>STON1-GTF2A1L, LHCGR</i> and <i>FSHR</i> | Laterality in neovascular age-related macular degeneration | NHGRI-EBI GWAS | 28775256  |
| rs2268363                        | 0.0032                     | 48.974.189 | $5 \times 10^{-8}$  | intron_variant     | <i>FSHR</i>                                         | Erectile dysfunction and prostate cancer treatment         | NHGRI-EBI GWAS | 20932654  |

Positions are based on the GRCh 38 build. Linkage disequilibrium (LD) estimates are based on the 1000G phase 1 EUR reference panel (obtained using PLINK 1.9). The data was taken on 25 April 2018 from NHGRI-EBI GWAS catalog (<https://www.ebi.ac.uk/gwas/>)



**A**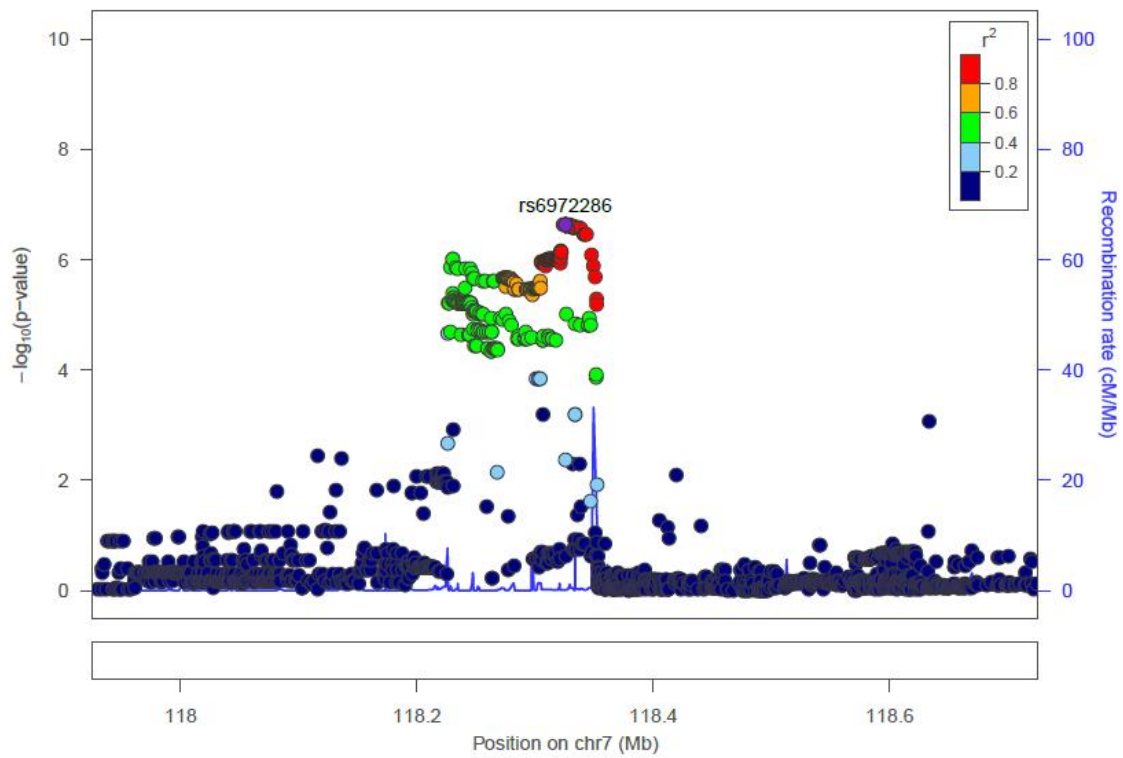**B**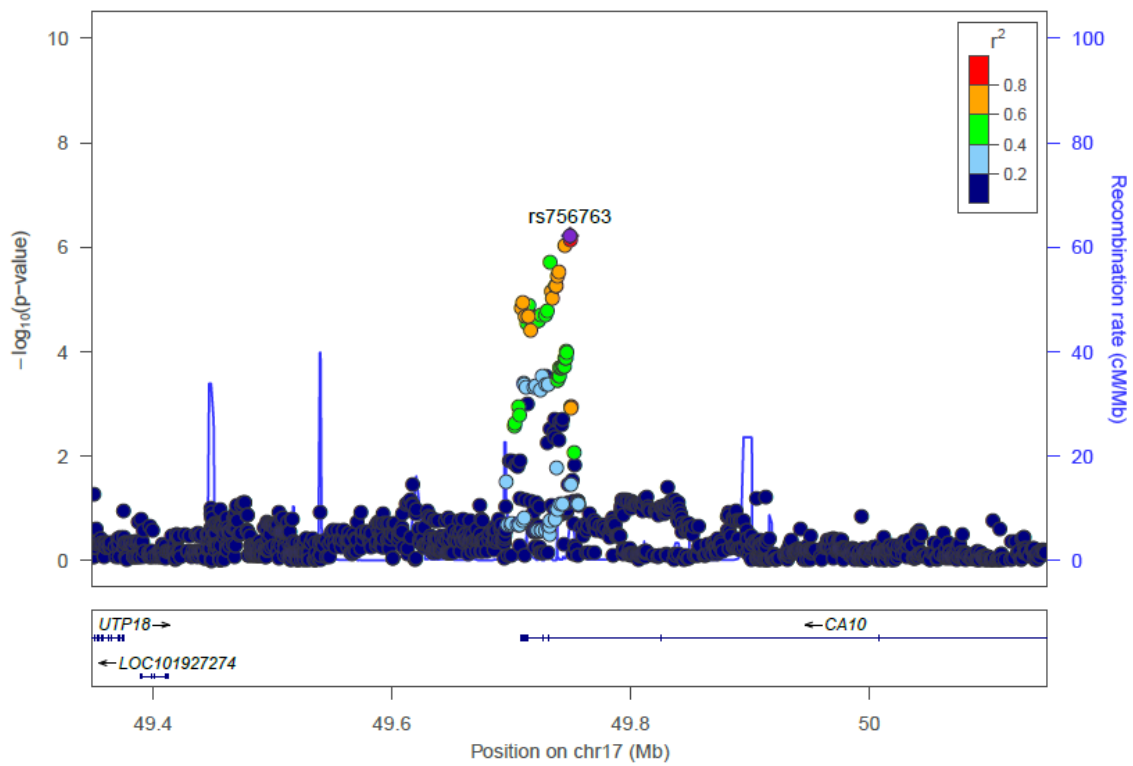

**Supplementary Figure1.** Regional association plots for TgAb-associated SNPs: rs6972286 (A) and rs756763 (B).

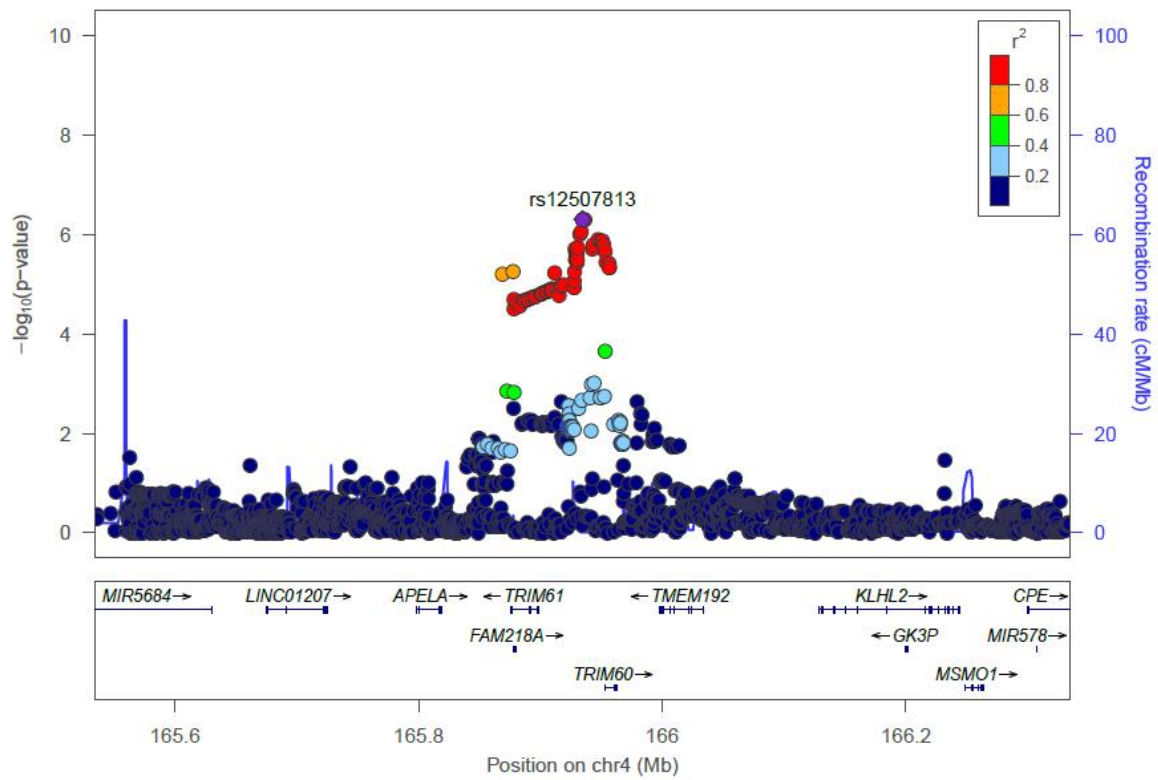

**Supplementary Figure 2.** Regional association plot for TPOAb-associated SNP rs12507813.

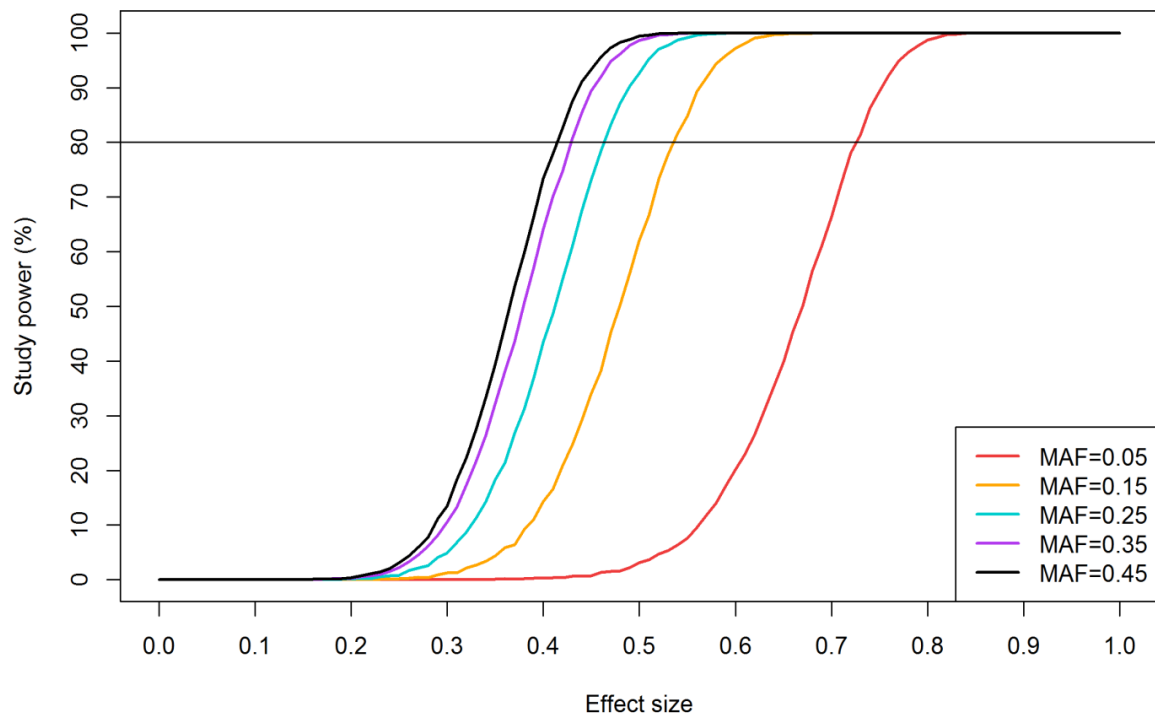

**Supplementary Figure 3.** Study power estimates for detection of variants with different effect sizes and minor allele frequencies (MAFs) on the genome-wide level.

**A**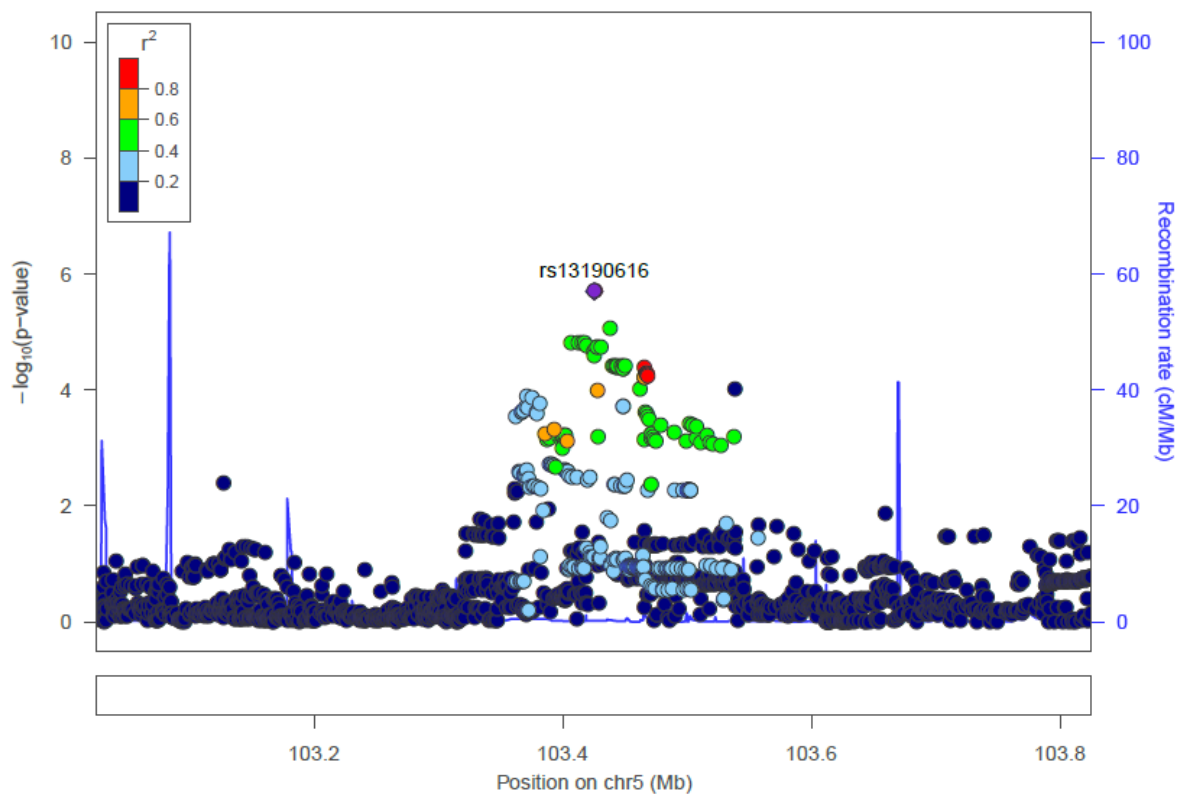**B**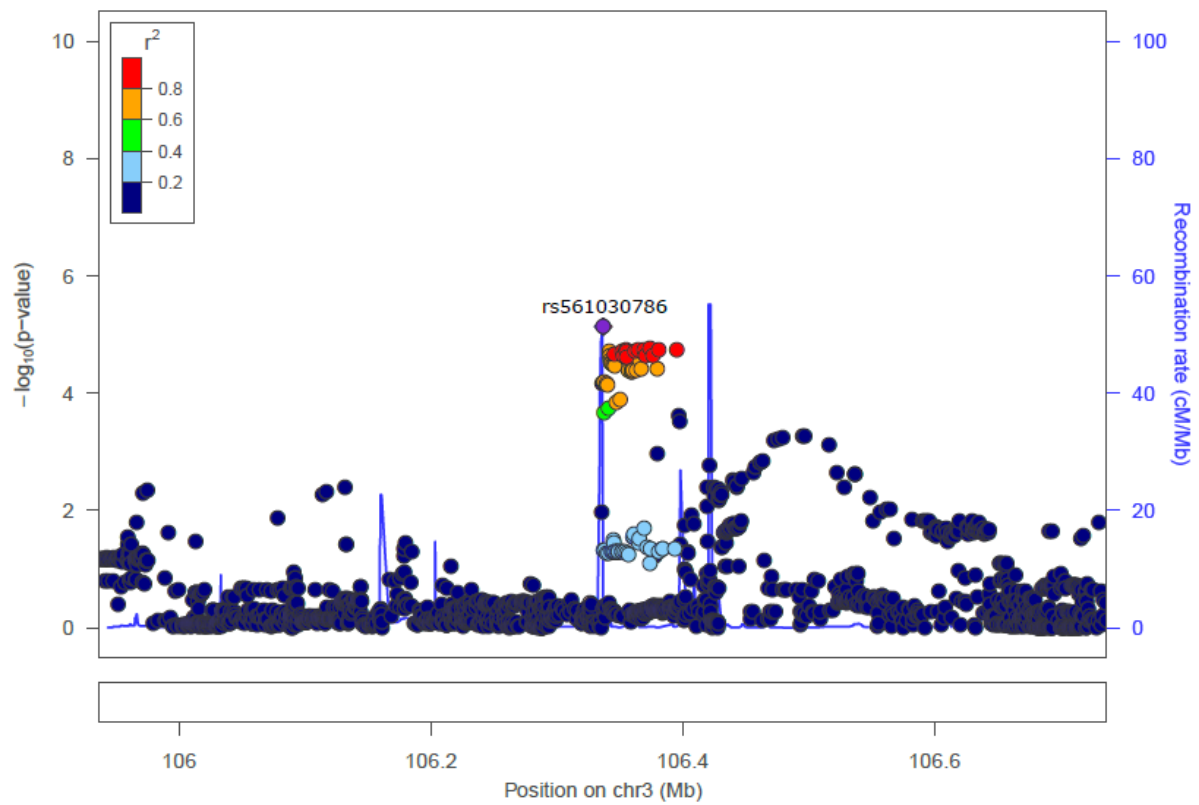

C

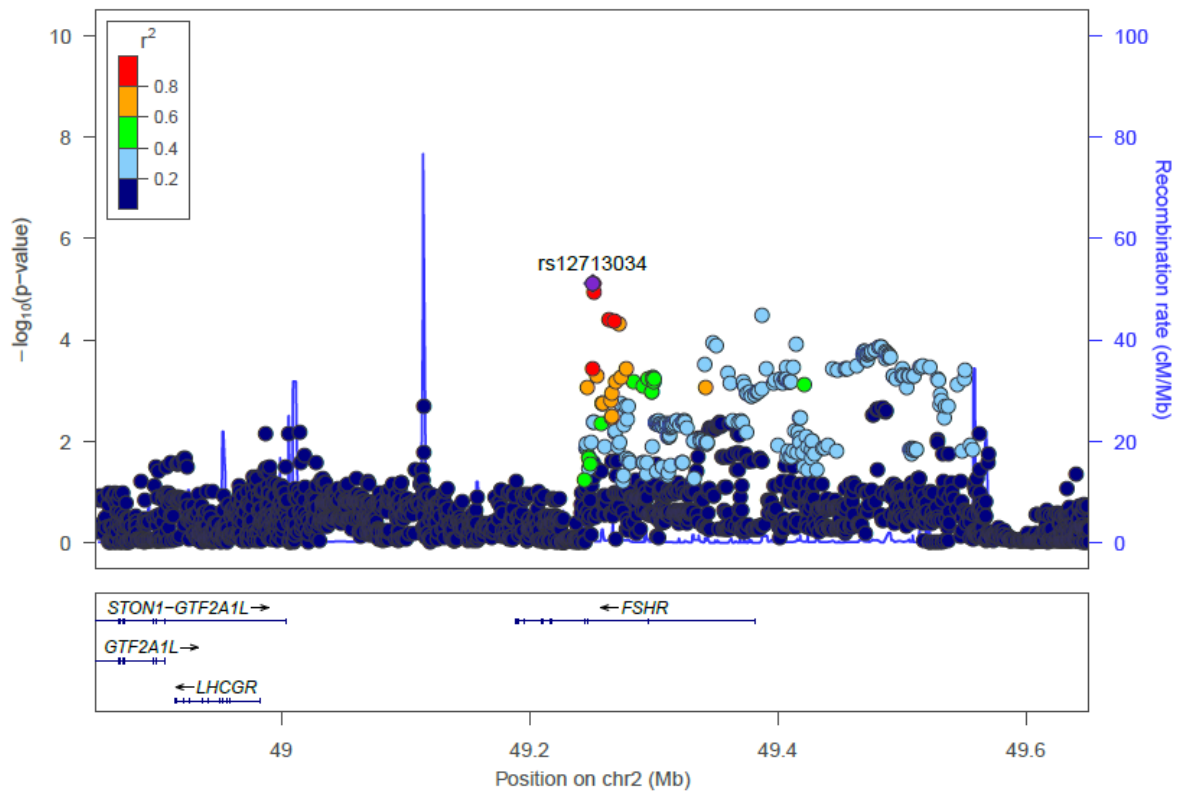

**Supplementary Figure 4.** Regional association plots for novel SNPs identified in bivariate GWAS analysis: rs13190616 (A), rs561030786 (B) and rs12713034 (C).

**A**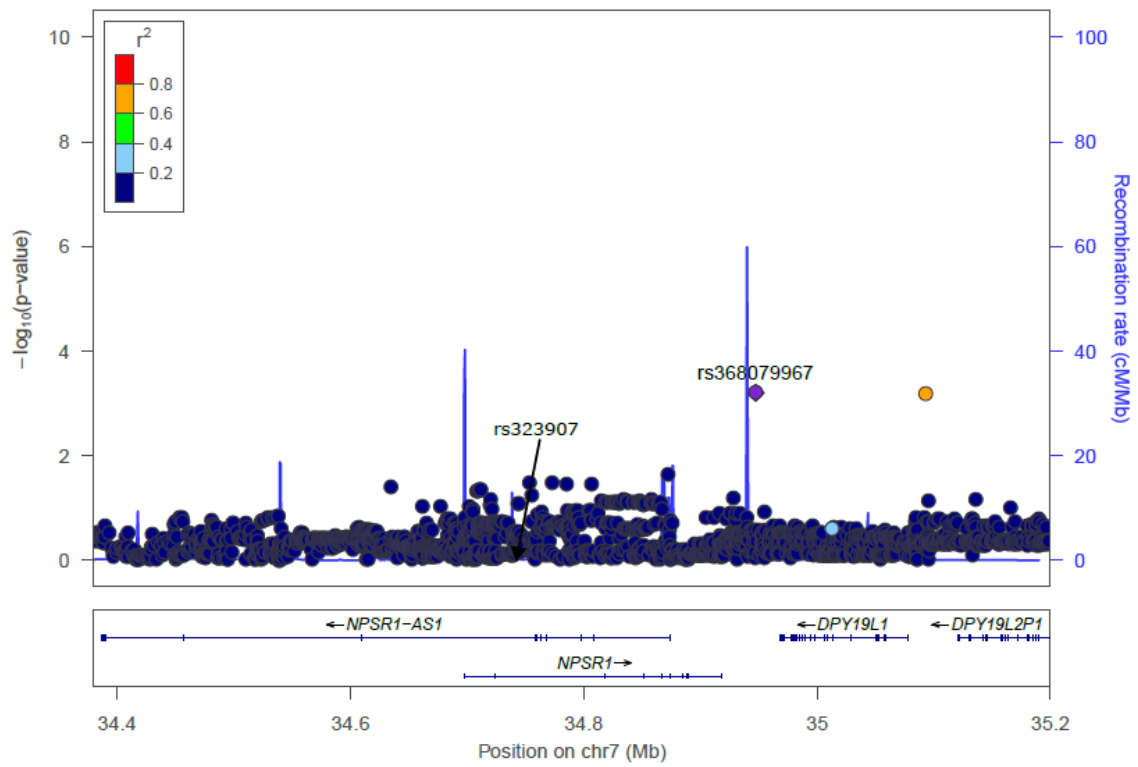**B**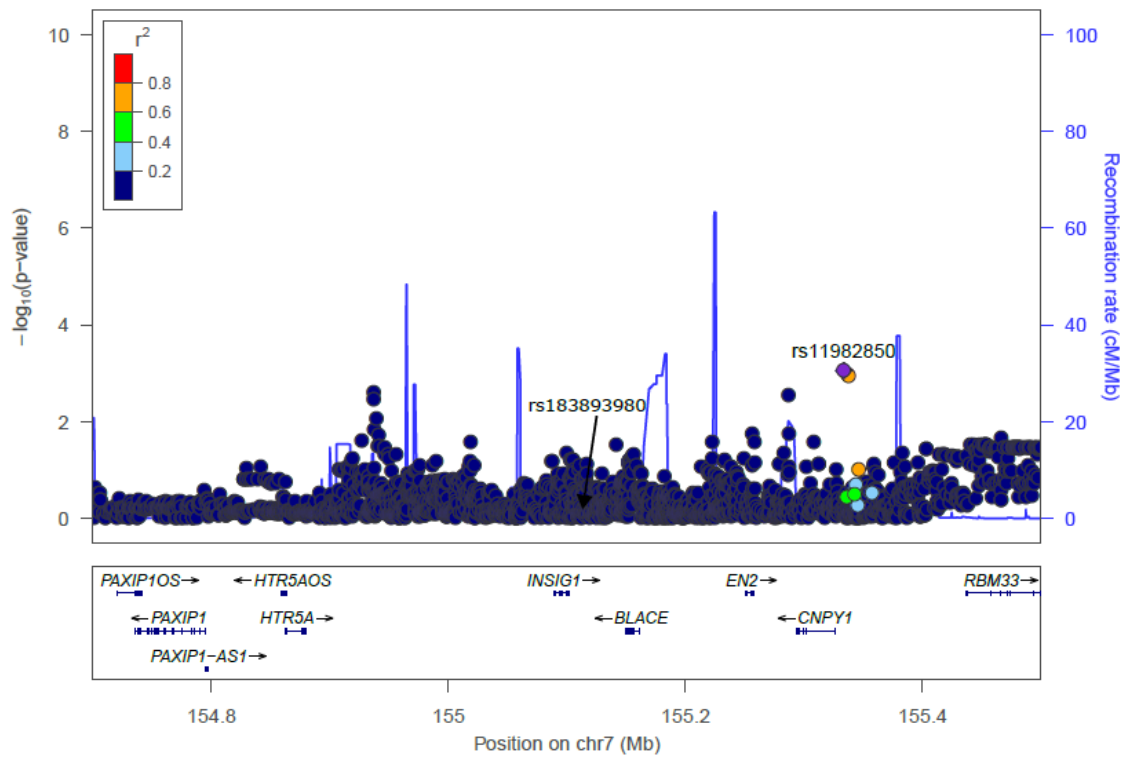

**Supplementary Figure 5.** The most associated SNPs in candidate gene regions with TgAb levels: rs368079967 (region surrounding originally reported rs323907 inside *NPSR1*) (A) and rs11982850 (region surrounding originally reported rs183893980 near *INSIG1*) (B).

**A**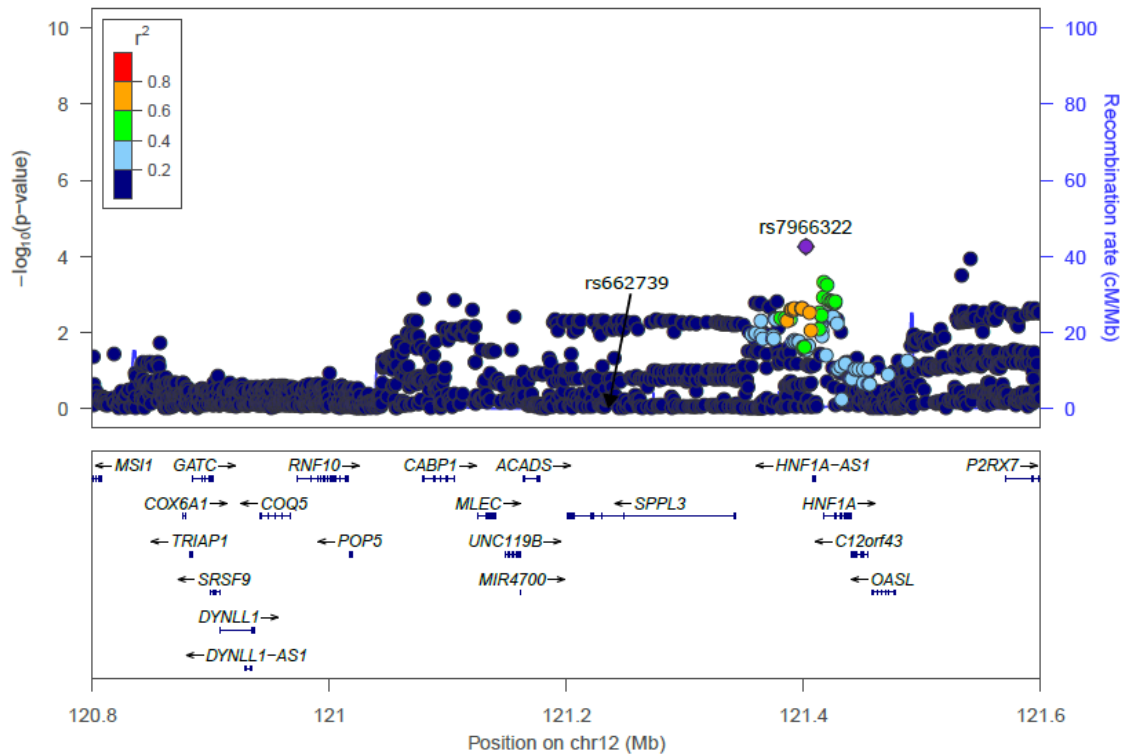**B**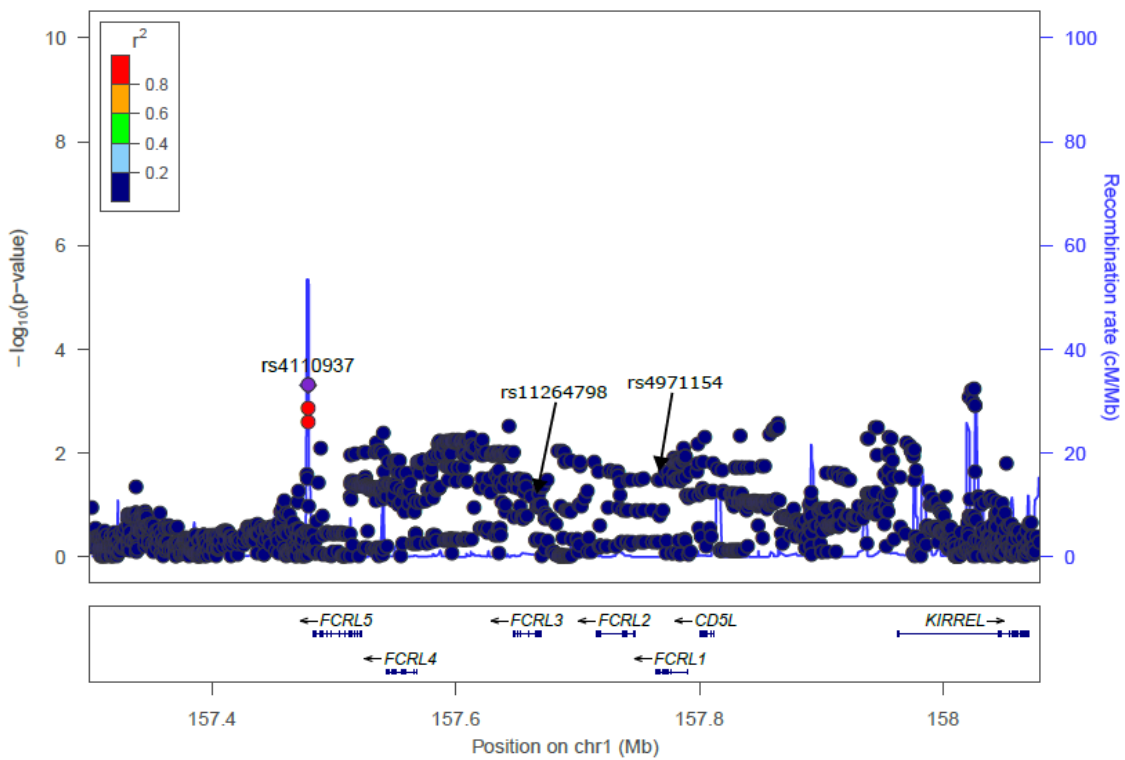

**Supplementary Figure 6.** The most associated SNPs in candidate gene regions with TPOAb levels: rs7966322 (region surrounding originally reported rs662739 inside *SPPL3*) (A) and rs4110937 (region surrounding originally reported rs11264798 inside *FCRL3* and rs4971154 inside *FCRL1*) (B).
